# Supplementary material for: Modeling of ships as a source of underwater noise
Source: Copernicus journal article supplement (doi:10.5194/os-2018-48), 2018-04-19
Supplement: Supplementary file [file os-2018-48-AC1-supplement.zip]

We thank the reviewers for their extensive comments. Below are our answers (in red). Modifications to the manuscript are indicated below. We hope these answers clarify the motivation and choices made in this work and hope that the manuscript can be published in Ocean Science.

It should be noted that an error was found in one of the formulas (part after Eq (6), describing the Pref) which has been corrected. A new model run was required because this change had an impact on all noise source maps and tabulated numbers. The revised manuscript with all other edits can be found within the supplement zip file.

#### **Reviewer 1 (Wittekind):**

The Wittekind model is valid for single screw ships only. Twin screw ships have in general lower propeller loading and a more homogenous wake field and therefore higher CIS. That is likely the reason that cruise liners and other twin screw ships appear quieter. Cruise vessels have CIS well above the mentioned 14 knots where diesel engine noise clearly prevails such that even if the propellers did cavitate they would be masked by diesel noise

*We thank the referee for the comments. The Baltic Sea fleet mostly consists of vessels with a single propeller. About 10% of the fleet operating in the Baltic Sea during 2015 has more than one propeller. Usually RoRo, RoPax, Cruise and icebreaker vessels normally use multiple propellers. If passenger vessels were given a higher CIS value in the model, it would make their contribution to noise energy smaller than what is presented in this paper. Conclusions of most significant shipping noise sources of this paper would remain unaffected. We tested the Wittekind formulas for RoPax vessels and indeed, the machinery part contribution may exceed the low frequency cavitation.*

The Wittekind model only considers 4-stroke engines be it for propulsion or as auxiliary diesels. 2-stroke engines are observed to have similar under water levels as resiliently mounted 4-stroke engines. If a heavy 2-stroke engine is taken as rigid mounted but with the same power-weightnoise relationship, diesel engine noise would be grossly overestimated. I do not think that the above remarks if entered into the map would change very much but I recommend checking what the allegedly overestimated contribution of the 2-stroke engines may do to it.

*About 82% of the vessels encountered in the Baltic Sea during the year 2015 were equipped with 4-stroke engines. We tested the impact of changing the engine mounting parameter to overall noise emissions of different kinds of vessels. A small cargo ship with single propeller and a 4-stroke main engine represents a case for which the noise source model was originally intended. As requested by the reviewer, in one of his later comments below calling for graphics for noise contributions, we added several images to Supplementary Material Section of the manuscript. The Supplementary Material Figure S7 presents the example of a small general cargo ship.*

*Supplementary Material Figs S8a and S8b illustrate the impact of flexible/rigid mounting, pointed out by the referee, for a feeder container vessel (1500 TEU). This vessel operates a single 2-stroke engine and has a FP propeller. Indeed, as the referee pointed out in his comment, a large difference exists in Source Levels because of engine mounting. Assuming rigid mounting makes machinery noise the dominating component of noise up to 6 kHz in this example. This specific vessel uses MAN S50MC-C series engine and according to the project guide of the engine, installation on epoxy or cast-iron chocks is required.*

*Figures S9a and S9b illustrate the impact of resilient/rigid mounting on source levels of a 150 000 DWT bulk carrier. The manufacturer of the engine (MAN 6S70MC) indicates that it is designed for rigid*

*installations on epoxy chocks. We acknowledge the comment that the original Wittekind noise source model was not specifically designed for vessels with large 2-stroke engines.*

*According to Rowen (2003), most engines are rigidly mounted. However, the Baltic Sea fleet significantly differs from the composition of the global fleet because of size restrictions of vessels. The handbook for diesel engines by Kuiken (2008) lists resilient mounting as the norm for category 1-2 engines, which are high- and medium speed diesels. According to Kuiken, engines in category 3 (medium to large 4-stroke engines) can be either resiliently or rigidly mounted, but majority of category 4 (large 2-stroke) engines are usually rigidly mounted. Indeed, technical manuals for Wartsila 32, 46 and 50 series, mentions that these can be installed with both options, but if resilient mounting is desired, the manufacturer needs to be consulted indicating that this is not necessarily the default option but rather an exception.*

*We have expanded the discussion of this issue in the manuscript to include the limitations of the original noise model (Section 3.3) and the justification for the assignment of engine mounting parameter. We also corrected a typo below Eq (4) concerning the assignment of the engine mounting parameter (Section 2.4).*

It would be interesting to know what the source depth was assumed to be

*This is irrelevant as the emitted power is independent of source depth.*

Maybe the Gigajoules could be converted into something more for feeling like the average equivalent URN level re 1  $\mu$ Pa in 100 m distance in 40 m water or something like this. It can be calculated by the educated but it would add to feeling what these numbers mean while reading

*One way to follow the reviewer is to add the following information: A source emitting 1 MJ during one year corresponds to a continuous monopole source with a SPL of approx. 156 dB re 1 microPa at 1m, assuming that the free-field approximation is valid. The purpose of this paper is to report a methodology for noise source maps and energy emitted. Adding distance dependency to source maps would give a rough indication of noise propagation and affected areas. This was not the focus of this paper, however, because propagation modelling was done using the point source description for each individual ship in the area. Propagation studies will be published as a separate manuscript at a later stage.*

*We have added the description above to the end of Section 2.6 (Noise source maps)*

Could the authors add a graph showing the output (source level) of the Wittekind model for 2 or three typical ships?

*Below is a collection of noise source graphs for various kinds of ships. Figure 1 represents a general cargo vessel with a 4-stroke engine and a single propeller. Figures 2a-b and 3a-b respond to the previous question of the referee concerning the engine mounting parameter selection. Figure 4-5 contain two examples of RoPaxes with more than one propeller. One of the test cases (Figure 4) represents a vessel type which is equipped with two electric propulsion units and four diesel generators to indicate the extreme case of a multi-engine, two propeller case with diesel-electric propulsion.*

*We have added these five noise source cases (in seven images) to Supplementary material. These illustrate the form of the noise source curves as a function of frequency using the approach described in this paper as well as the impact of using rigid/resilient mounting for engines.*

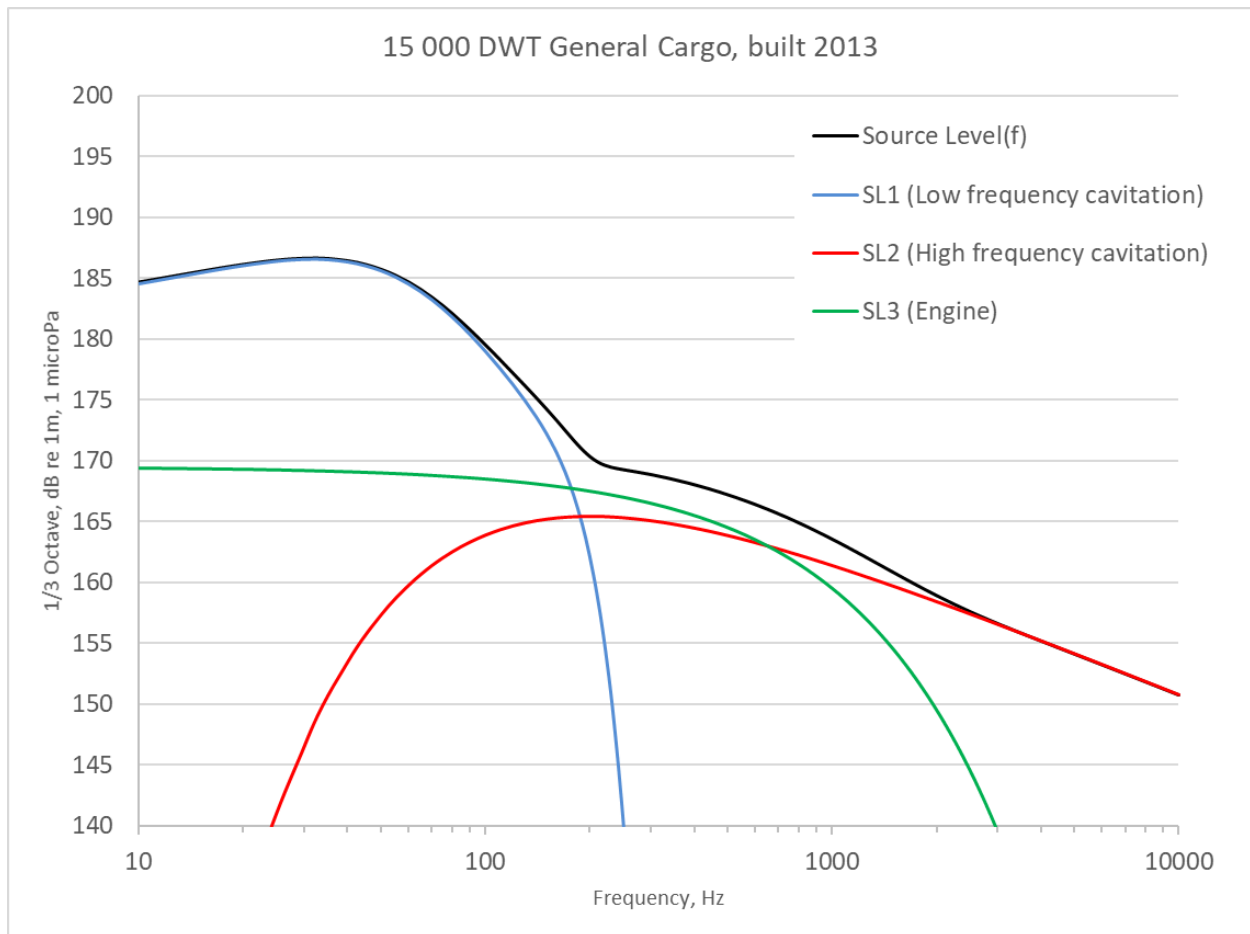

Figure 1 Source levels for a 15 000 DWT General Cargo vessel with 4-stroke engine and a FP propeller at design speed of 14.5 knots.

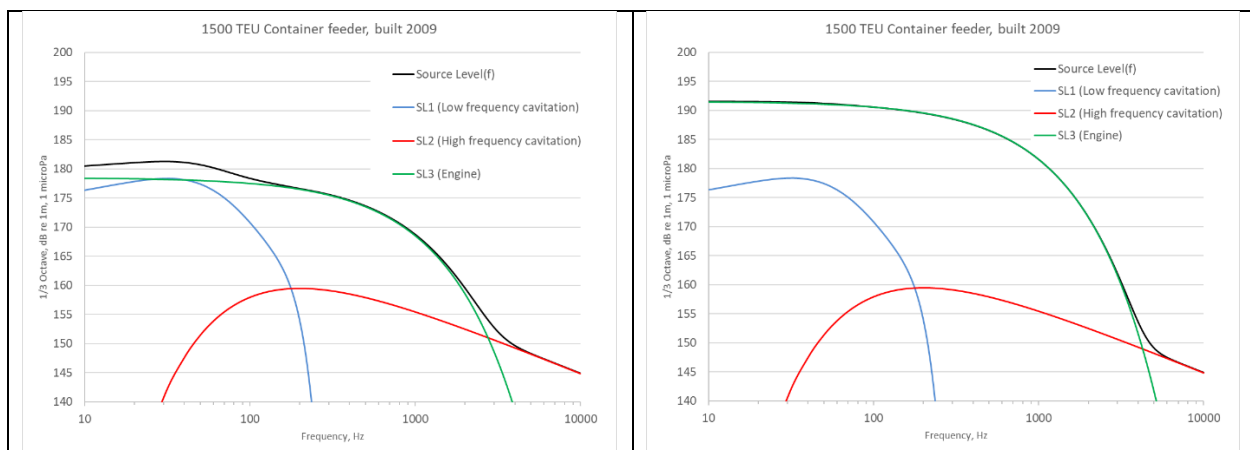

Figure 2 a and b. Noise source levels for a 1500 TEU Container feeder vessel with a 2-stroke engine and a FP propeller assuming flexible mounting (a, left) and rigid mounting (b, right). Vessel traveling at design speed of 19.8 knots

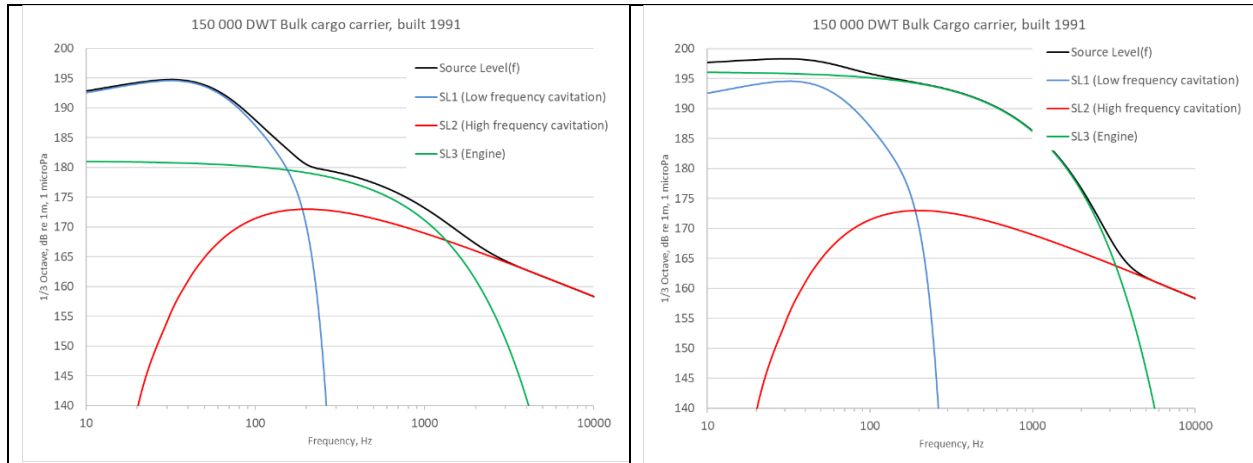

Figure 3a and b. Noise source levels of an 150 000 DWT Bulk cargo carrier with a 2-stroke engine with a FP propeller. Source levels estimated assuming flexible mounting (a, left) and rigid mounting (b, right), with vessel traveling at design speed of 13.7 knots.

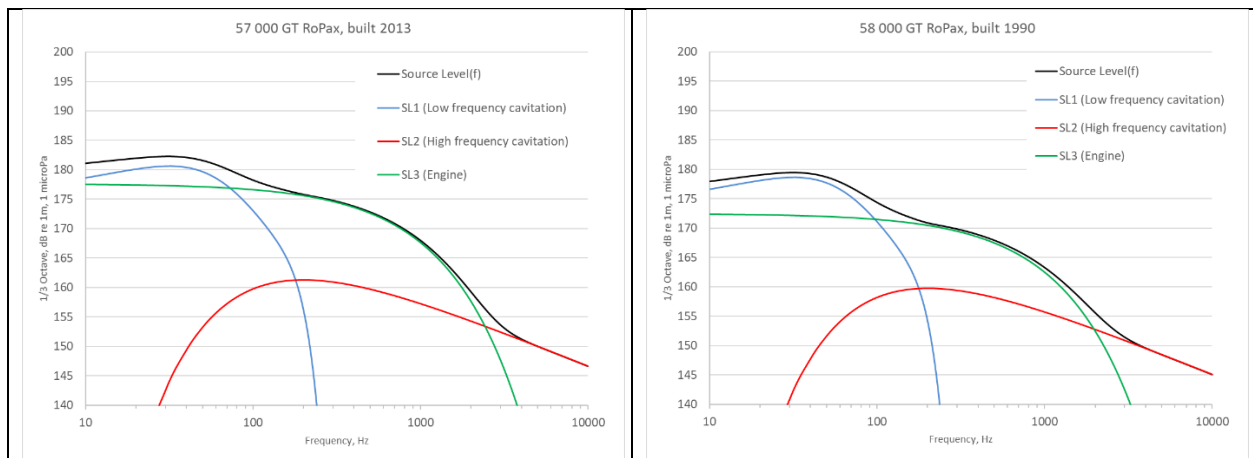

Figures 4 and 5. Noise source levels of a 57 000 GT RoPax with four 4-stroke main engines driving two electrical motors with two CP propellers, traveling at design speed 21.8 knots (left) and 58 000 GT RoPax, which has four 4-stroke main engines and two CP propellers, at design speed of 21 knots (right). Both cases assume resilient mounting of engines.

## Reviewer 2 (Farcas):

Farcas: It would be useful to compare or at least comment of the differences between the Wittekind source model used here and other models previously used in literature. For example, many shipping noise mapping methodologies might be based on the old Ross (1976) model that uses only the vessel speed and length to estimate the source levels of individual ships. Of course, a meaningful assessment would ultimately require a comparison of the noise maps based on the two source models and their statistical analysis; but even a comparison based on the noise source maps as produced by the methodology presented here might provide useful insights into the merits of using a more sophisticated source model.

In the beginning of the current work, a review was made to consider various noise models available in the literature. The Wittekind noise model was selected because of its performance against available measurements and its technical features improve the knowledge of individual contributions to vessel noise. From practical point of view, the significance of the availability of data to implement the model selected cannot be overlooked. Below is a comparison of investigated models; these are from existing literature (Ross, W-H, RANDI) as well a more recent one (SONIC) from on-going work of the institutes involved also in this study. As can be seen from this figure, the Ross model fails to reproduce the low frequency hump observed in noise measurements. Also, application of a 40-year-old model to current fleet raises some questions of its suitability, especially if the model considered relies on base spectra obtained with confidential measurements done after the WWII.

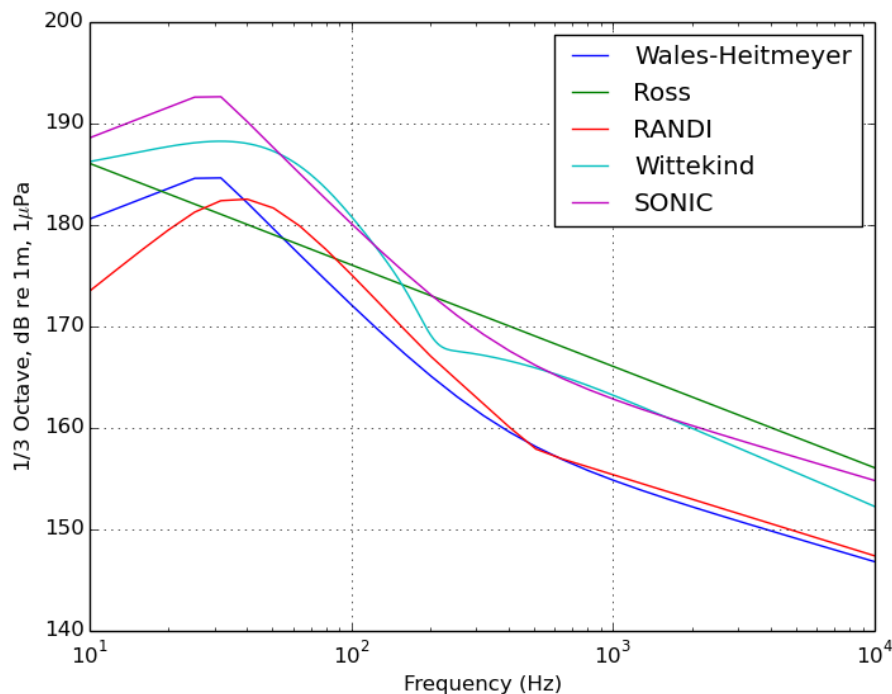

Figure 5 Predicted source levels of a medium size bulk carrier

Of all the investigated models in this case, the Ross model predicts the highest source levels in the >2 kHz range, whereas low frequency contribution is clearly smaller than with most of the other models considered. The SONIC approach uses Wales-Heitmeyer approach as base spectrum and these two models are somewhat interlinked. However, the other approaches were much more limited in the technical description of vessels than what was available for the current work. Our selection of the Wittekind noise model was considered the best fit considering the performance, available data and quantities available from the existing emission model (STEAM).

Noting the findings which were made during initial selection for noise model implementation, a full implementation of other noise models in the current work would require a significant effort which is beyond us at this point considering the scope of current work. Our hope is that the referee agrees with this decision and accepts our justification for selecting the Wittekind model.

Farcas: The Block coefficient should be introduced or explained earlier in the text (currently it

is explained that is a function of the hull shape only on its third mention, on page 5, line 26).

*Corrected*

Farcas: I am not an expert on ship source models, but it seems to me that the machinery noise source level would scale with the engine power rather than engine mass (of course, with appropriate scaling factors for different engine types). It appears that for two and four strokes engines, these scaling factors are as such that one can replace engine power with mass and use just one scaling factor (namely the coefficient 15, in equation 4). But for turbine machinery, this no longer holds, as the authors indicate that there is no correlation between engine mass and power. However, the important question here is if a correlation does exist between the source levels and the engine power; if this is indeed the case, then an appropriate version of equation 4 should be used for such machinery, rather than plugging in the same mass dependency with the arbitrary factor of 0.001 ton/kW.

*We agree with the reviewer, to an extent. However, it is not as simple as that. For example, a RoPax vessel with multiple main engines may not use all of them at the same time. This means that the power taken from one engine will vibrate one engine mass. Power taken from all engines will vibrate all engines. Number of engines operating when the ship is propelled at speeds indicated by AIS position reports is evaluated during the STEAM model run. Further, this paper describes a practical implementation of the Wittekind noise model and our intent is not to produce a revised Wittekind model itself.*

*The discussion of turbine machinery is relevant, however. The application of the Wittekind noise model to ships with turbines is clearly outside the scope of application of the original model. We could not find relevant data for noise measurements for ships with turbines, but it is very likely that their machinery noise contribution may be quite different from a vessel with diesel engines. There are hundreds of ships with turbine machinery in the global fleet, but these represent less than one percent of the fleet. The noise emission contribution of vessels with turbine machinery operating in the Baltic Sea in 2015 is next to nothing, excluding the potential contribution from warships with CODAGs but these vessels are not visible in AIS anyway. Disregarding the machinery term in case of turbines, high and low frequency cavitation noise contributions would remain nonzero. In our view, it was better to leave these contributions as they are and rely on an existing expert source concerning the power/weight relation of turbine machinery.*

\* Farcas: The finding related to containerships (that they are responsible for 25% of the noise energy) is quite interesting, but I'm not sure what is meant by them representing "about three percent of the ships in the Baltic Sea during 2015" – is this 3% of the total number of ships ever reported in 2015 in the area? Is the disproportionately high contribution of containerships to the total noise energy due to e.g. the greater number of "active" days per ship in this category than for ships in other categories (that might have been present or active only sporadically during the year), or perhaps this is due to more subtle factors related to source characteristics of containerships?

*We fixed a spreadsheet error and updated Figure 4 to better reflect the issue raised by the reviewer. We introduced a new metric, noise efficiency, which is analogous to energy efficiency. This quantity describes noise energy emitted per distance travelled and amount of cargo carried. The unit is millijoules  $\text{ton}^{-1} \text{ km}^{-1}$ . This metric takes the amount of cargo carried into consideration in a similar manner as the IMO Energy Efficiency Operation Index (EEOI).*

*We have added the following to Section 3.1:*

*"Plotting noise energy emitted by each ship type as relative to total noise energy emitted at each band indicates that containership and bulk cargo carriers are the two largest sources of underwater shipping noise in the Baltic Sea area. Containerships represent less than three percent from all ships, but are*

responsible for 27 % of the noise emitted at 125 Hz band. Bulk cargo carriers also have high share of noise emissions, but bulkers represent a significantly larger share from total numbers of ships (8%). (Error! Reference source not found.Error! Reference source not found.; Error! Reference source not found.). Analogous to energy efficiency metrics, reported in grams of CO<sub>2</sub> emitted per amount of cargo carried and distance travelled (in g ton<sup>-1</sup> km<sup>-1</sup>), the emitted noise energy should also be compared to transport work or distance travelled. If done this way, containerships represent 15% of the transport work and emit 23% of the noise energy (sum of noise energy emitted at 63, 125 and 2000 Hz bands). In case of bulk cargo ships, the share of noise energy emissions is 23% and share of the transport work done is 21%. Considering the large share of transport work, bulk and general cargo ships emit less noise than containerships. The largest discrepancies between noise energy emitted and distance travelled occur with RoPax vessels, which are responsible for three percent of the transport work and contribute nine percent of the noise energy (sum of energy over all three bands) emitted in the Baltic Sea area. If noise efficiency is defined as joules of noise energy emitted for each ton km of cargo carried, noise efficiency in mJ ton<sup>-1</sup> km<sup>-1</sup> is very high for RoPax vessels (920 millijoules ton<sup>-1</sup> km<sup>-1</sup>) whereas for containerships and bulkers these are 491 and 360 mJ ton<sup>-1</sup> km<sup>-1</sup>, respectively. With this metrics, best noise efficiency is achieved with slow moving vessels, like general cargo carriers and crude oil tankers, which emit less than 200 millijoules of noise energy per ton km carried”

\* Farcas: The noise source “map” concept is a modelling product that has both the spatial dimensions and the dimension of time. Figure 3 presents a spatial output, cumulated in time; the subsequent figures show information that was also cumulated in time. It would be perhaps informative to present some outputs that expose the time-dimension, be it locally or spatially averaged, for different ship types or for all – if such outputs showed anything interesting or insightful.

An upward trend could be observed when monthly totals were plotted. Part of the monthly variation is because of different number of days, but also daily average emissions are increasing towards the end of the year. The difference in average daily emissions can be over 20%, maximum was found in October and the minimum in January.

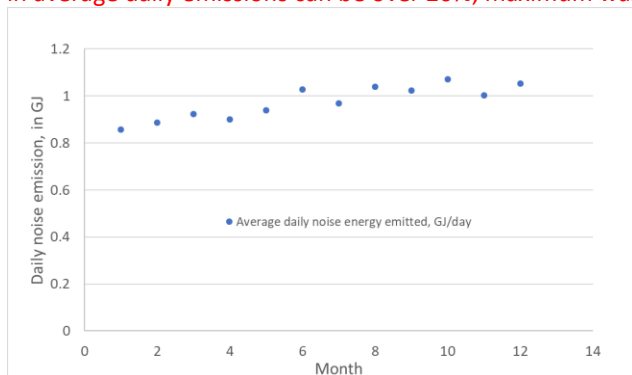

We added the following to Section 3.1 (Shipping noise emissions in the Baltic Se area):

“The noise emissions increase towards the end of 2015. Maximum monthly noise energy is emitted in December 2015, 32 GJ/month whereas the minimum occurs in February, 25 GJ/month. These are summed energies over all three bands, 63, 125 and 2000 Hz. Daily noise energy emissions of January are 0.86 GJ/day, but emissions towards the end of year 2015 already exceed 1 GJ/day (the daily maximum occurs in October, 1.07 GJ/day). These indicate 20% growth in noise energy emissions (in gigajoules, not dB) during 2015.”

Farcas: Missing space “battlefield(warships)” on page 2 line 11

*Corrected*

Farcas: On page 4, line 5, “for which 10 000 tons should be used” – this is not really a recommendation, but a definition – use more decisive language, like “which is 10 000 tons”.

*Corrected*

Farcas: Both “tons” and “tonnes” appear in the manuscript – is this correct? (tonnes are unambiguous, being a S.I. metric unit, while tons could be either “short” or “long” though this is probably the British “long ton” which is 1016 kg, used even in US in the naval context, and closer to the metric “tonne” than the U.S. “short ton”, which is 907.2 kg)

*All entries corrected to tonnes*

Farcas: Page 4, lines 21-21, “because all two stroke engines the cylinder arrangement is of in-line type” – does not read well. On page 8, line 26, “methodology how underwater noise[: : :]” – perhaps use “methodology describing how underwater noise[: : :]”

*We have corrected these to: “This does not apply to 2-stroke engines, because only in-line engines are used” and*

Farcas: The Summary section could be tweaked – it sounds a bit too informal, the style is too “oral” like the conclusions of a presentation (e.g. “Our conclusions concerning this work are the following.”, “It is evident that routine monitoring is required.”)

*This language of this section was improved and two conclusions concerning the disproportionately large RoPax contribution to vessel noise and applicability of Wittekind noise model to multi-propeller, multi-engine vessels, were added.*

Farcas: I agree that Gigajoules are not the most intuitive units for presenting the energy of the noise sources, but a conversion to source levels re 1  $\mu$ Pa@100 m distance is still hard to make sense of, since the energy is cumulated over 1 year and either integrated over the 0.32 km<sup>2</sup> cell (for the map of Figure 3) or cumulated for all the ships of a certain type (Figure 5).

*This discussion is similar to atmospheric emission reporting. Gridded emission maps will use a quantity (mass/energy) per time (year/month/day/hour) and surface area (grid cell area). These can be normalised to unit area, like square kilometre, when area sources are considered.*

*In this paper, we developed a physically meaningful parameter which can be presented in a map format and which would include also the time dimension. Reporting instantaneous values for source levels at a specific time will not describe the overall shipping noise levels very well and some sort of averaging needs to take place. The STEAM model output has two specific data products (noise maps + point source data for noise), but the aim was to report noise emissions only, at 1 microPa 1m, and not extend the approach to propagation modelling. To obtain noise levels at any other distance than 1 m away from the propeller, transmission loss would need to be evaluated. This is beyond the scope of the work reported in this paper, because the current approach focuses on emission sources and not on noise propagation. Noise*



*propagation studies will be reported in a separate paper and the evaluation of the Wittekind performance was recently published by Karasalo et al (Front. Mar. Sci, 2017). In the future, simple propagation approaches could be considered.*

*The reviewer 1 (Dr Wittekind) also called for an alternative presentation for the maps, see the response there. We have made the following addition to the end of Section 2.6 (Noise source maps):*

*“With these definitions, a source emitting one megajoule of noise for one year corresponds to a continuous monopole source with approximately 156 dB re 1  $\mu$ Pa at 1 m sound pressure level, assuming that free-field approximation is valid.”*

*We have also replaced the noise map figure with a version which illustrates the noise energy emissions per unit area (one square kilometre).*

Farcas: For a single ship (of a certain category) perhaps it would be interesting to know some sort of average source levels (e.g. SL @1m per average containership, averaged over the full year, or only over the active period); in terms of a map, the average noise levels in the field would certainly be interesting, but obviously these are not straightforward to calculate (the propagation from each cell out to, say, 100 km would need to be computed, etc.)

Consider this example: A 1000 TEU feeder containership sails the Baltic Sea: Noise energy emitted at 63 Hz band is 0.62 MJ/year (0.46 MJ@125 Hz; 7.34 kJ@2000Hz). The time spent in the cruising mode (speed over >5 knots) is 418 200 seconds. The noise energy emitted is 1.47 J/sec@63Hz band. If  $p_{ref} = 1 \mu Pa$ , seawater density is 1025 kg m<sup>-3</sup> and speed of sound in water is 1425 m sec<sup>-1</sup>, then according to Eq (6) of the manuscript the SL at 63 Hz band is 172 dB. Corresponding SL at 125 and 2000 Hz are 171 dB and 153 dB, respectively.

#### **Reviewer 3 (Gassman):**

While the uncertainty of the derived underwater noise energy is qualitatively discussed, the paper may benefit from a quantitative evaluation of the uncertainty via some type of error model that takes into account the various uncertainties that were qualitatively discussed in the manuscript. An illustration of the ship type distribution (e.g. manuscript only mentioned 3% were container ships) may add value to the paper as well.

We have included discussion of engine mounting parameter as requested by other reviewers. Examples of changes caused by rigid/resilient mounting are depicted in Supplementary Material Figures S9-S9. Another test was performed with cavitation inception speed, which has a large impact on predicted noise. We modified the speed ranges of Eq (5) in such a way that the range of speeds where cavitation starts to occur was one knot higher than what was originally used (9->10 knots, 14->15 knots). This increased the share of ships operating below  $V_{CIS}$  and reduced the emitted noise. Largest impacts were seen with slow-moving vessel types (tankers, cargo ships), especially at 63 Hz frequency band. RoPax and cruise vessels were largely unaffected (-7% @63 Hz; -1% @63 Hz) because these vessels usually operate at higher speeds than the tested upper limit of 15 knots.

Noise energy at 63 Hz band from tankers was reduced by 39%, whereas cargo ship noise was reduced by 27%.

We have added the following paragraph to Section 3.2:

“We tested the impact of  $V_{CIS}$  uncertainty by testing the sensitivity of predicted noise to cavitation inception speed by altering the lower and upper bounds of Eq (5) to ten and 15 knots. This increased the speed range where propellers cavitate and will lead to larger portion of the fleet operating at non-cavitating conditions than under default assumption. The differences in predicted noise energy in the Baltic Se area were most pronounced in the low frequency band (63 Hz), where the total noise energy emitted was decreased by 26% when higher values of  $V_{CIS}$  were applied. For all considered frequency bands, the total reduction was 19%. Sum of energy emitted at higher frequency bands was also decreased, by seven percent for both 125 and 2000 Hz bands, respectively. Change of cavitation speed range altered the noise energy emissions from RoPaxes only by seven percent and results for passenger cruise vessels were unchanged. This is probably because RoPax and cruise vessels mostly operate at speeds larger than 15 knots and cavitation still occurs regardless of the higher  $V_{CIS}$  tested here. For containerships, noise emissions were reduced by 19%, but largest changes (-39%) occurred in the tanker class of ships. Contributions from other slow-moving vessels, like cargo ships were also significantly reduced (-27%).”

Page 2, line 4: omit ‘the’ before propeller cavitation

*Corrected*

Page 3, line 13: ‘The Wittekind noise source model: : :’ (add ‘The’)

*Corrected*

Page 6 line 9: please mention chosen grid cell area A in method section.

We have added the following to Section 2.6 (Noise source maps):

“It should be noted that the number presented as a map are a function of grid cell area and should be normalised to unit area. In this work we have used one square kilometre as grid cell size.”

Noise map (Figure 3) was updated to reflect the results obtained for unit area ( $1 \text{ km}^2$ )

Page 7 , line 8: consider adding the names of the ports and islands on the map in figure 3.

Names of selected ports were added to Figure 3.

Page 7, line 10: Containerships by themselves represent about: : :

*Corrected*

Page7, 13/14: Please explain why ships transit in 2015 slower than normal

*We added the following discussion to end of Section 3.1:*

*“Voluntary speed reduction was also observed in the Third IMO GHG study (Smith et al., 2014), especially in the container ship class of ships. Speed reduction may occur in situations where vessels may not be fully loaded, overcapacity in the market exists and costs can be lowered by sailing slower than the design speed. The required power, and also the fuel consumption, are cubic functions of speed and speed reductions may lead to significant savings if vessel schedules allow it.”*

Figure 1: horizontal axis may be rescaled up to <450 tons for better visibility

*Corrected*

Figure 2: horizontal axis may be rescaled up to <2500 tons for better visibility

*Corrected*

Figure 3: cannot pick out any yellow or red colors. Rescaling of colorbar may bring out better the smaller-scale differences in shipping noise between shipping lanes, which are currently all green or light blue. Would also suggest to make the labels of the colorbar aligned horizontally or have a vertical colorbar for better presentation and ease of use.

*We have redone Fig3 completely. We added modified the colorscale and secondary labels were added to indicate noise energy per unit area (one square km), which makes the numerical values represented here independent of grid square size. We also added labels for selected ports.*

Figure 4: consider integrating the ‘Other’ stack into the pie chart: slices shouldn’t be too small as the 7% slices look big enough

*We have updated Figure 4 to improve readability. The new figure lists vessel types, their share from total number of vessels, share of transport work done and noise energy emitted at 63, 125, 2000 Hz bands.*

It would be interesting to see a comment (/motivation) on the choice of source model. I.e. to point out the advantages with this choice compared to older models in the literature. As both the authors and Dr. Wittekind points out in his comment, the model is mainly intended for large ocean going vessels with a

single propeller. It would also be interesting to hear the authors view on this in relation to other recent studies trying to improve parametric models of ship source level for the purpose of mapping underwater noise emission from ships, e.g. [1, 2].

*The section of noise model for implementation was based on the performance of the model, availability of technical data required for proper implementation and separate description of high and low frequency contributions to source levels. Also, the noise model should be made to describe source levels of modern vessel fleet. Both Wittekind and AQUO approaches would fulfill these requirements, but the initial requirements for AQUO approach were different from ours. As stated in the AQUO D2.9 report to which the reviewer points to, one key requirements of AQUO was that all data for noise modeling need to be freely accessible (i.e. no commercially available datasets were used). In the current work, we had access to technical specifications of vessels and had the possibility to include machinery data which was not used in AQUO. The Wittekind model is dependent on physical and technical description of vessels and no predefined approaches exist for different ship types. In our opinion, this is an appealing approach because source levels depend on technical properties of vessels. Database searches with an IMO number offers a higher chance of properly identifying the vessel type than AIS messages. We acknowledge the excellent measurement work done in AQUO project, but the modeling effort of the current work is based on different initial requirements.*

We have modified the Section 2.2:

*“Wittekind noise source model describes the ship noise as a combination of three contributions, which arise from low and high frequency cavitation and machinery noise. These are linked to vessel properties, like displacement, hull shape and machinery specifications, which is in contrast with some previously introduced ship noise models (McKenna et al., 2012; Wales and Heitmeyer, 2002).”*

Regarding the simulation methodology, it would be interesting if the authors could put their work in relation to other similar attempts, e.g. [3, 4]. Especially since some of the co-authors, here are also co-authors of [4].

*In Section 2.6, we have added reference to Audoly et al (2015) which presents the AQUO approach  
Also, at the last paragraph of page 6, a reference to Gaggero et al (2015) was added*

Also, a few suggested changes not related to the reviewer comments:

The reference (Li & Hallander, 2015), which is a popular text (without references) in SSPA customer magazine, is not the original source. I think the paper/report by Wittekind [6] is better as a general reference on this well known phenomena.

*Corrected*

---

Misc corrections (not from reviewers):

Corrected an error in Pref, just after Eq (6) on 6, Pref definition was wrong ( $2\pi\text{pref}^2$ ) when it should have been ( $4\pi\text{pref}^2$ ). This had a large impact on numerical results and we redid all the calculations with the corrected equation and redrew the images to reflect this change.
